# Supplementary material
Source: MDPI journal article supplement (https://www.mdpi.com/2297-8739/11/5/135)
Supplement: s1 [file s1]

# Exploring Varied (Green) Extraction Methods to Optimize Galia Melon Antioxidant Potential

Vassileios Dimtsas, Anastasia Douma, Dimitra Soukia, Theodoros Chatzimitakos \*, Vassilis Athanasiadis, Konstantina Kotsou, Eleni Bozinou and Stavros I. Lalas

Department of Food Science & Nutrition, University of Thessaly, Terma N. Temponera Str., 43100 Karditsa, Greece

\* Correspondence: tchatzimitakos@uth.gr

## 2.1. Chemicals and Reagents

All solvents were at least of HPLC grade and purchased from Carlo Erba (Valde Reuil, France). Chemical standards of polyphenolic compounds, such as 3-hydroxytyrosol, hesperidin, catechin, rutin, pelargonin chloride, luteolin-7-glucoside, cyanidin-3-O-glucoside and chlorogenic acid, were acquired from Sigma-Aldrich (Steinheim, Germany). Hydrochloric acid, ascorbic acid, trichloroacetic acid, ferric (III) chloride, aluminum chloride, and sodium acetate were also obtained from Sigma-Aldrich (Steinheim, Germany). Gallic acid, anhydrous sodium carbonate, Folin-Ciocalteu reagent, 2,2-diphenyl-1-picrylhydrazyl (DPPH), and 2,4,6-tri-2-pyridinyl-1,3,5-triazine (TPTZ) were obtained by Penta (Prague, Czech Republic). For all experiments, deionized water was used.

## 2.3. Response Surface Methodology (RSM) Optimization of Extraction and Experiment Design

Utilizing the Response Surface Methodology (RSM) technique, the extraction of total polyphenol content (TPC), polyphenolic compounds, and antioxidant activity was measured using the FRAP, DPPH method aimed for optimal yield. The design's objective was to enhance the content of Galia melon peel in TPC, polyphenolic compounds, and antioxidant activity. This was achieved through adjustments to the extraction procedure involving parameters such as solvent concentration (ethanol, EtOH) represented as  $C$ , %  $v/v$ , extraction duration denoted as  $t$ , min, and extraction temperature indicated as  $T$ , °C. An experiment employing a main effect screening design with twenty design points formed the basis for optimization. Process variables were set at five levels, as outlined in Table 1, indicating both coded and actual levels. Analysis of variance (ANOVA) and summary-of-fit tests were employed to establish overall model significance ( $R^2$ ,  $p$ -value) and the significance of model coefficients (equations). Additionally, a second-order polynomial model (Equation S1) was utilized to forecast the dependent variable based on the analyzed independent factors:

$$Y_k = \beta_0 + \sum_{i=1}^2 \beta_i X_i + \sum_{i=1}^2 \beta_{ii} X_i^2 + \sum_{i=1}^2 \sum_{j=i+1}^3 \beta_{ij} X_i X_j \quad (S1)$$

where  $Y_k$  is the predicted response variable;  $X_i$  and  $X_j$  are the independent variables;  $\beta_0$ ,  $\beta_i$ ,  $\beta_{ii}$ , and  $\beta_{ij}$  are the intercept, regression coefficients of the linear, quadratic, and interaction terms of the model, respectively.

## 2.4. Analyses of Extracts and HPLC-Based Analysis of the various Polyphenolic compounds

### 2.4.1. Total Polyphenol Content (TPC) Determination

Following a previously established methodology [1], the total polyphenol content (TPC) of the extracts was determined using the Folin-Ciocalteu assay. In brief, a 1.5 mL Eppendorf tube was filled with 100  $\mu$ L of Galia melon peel extracts and 100  $\mu$ L of Folin-Ciocalteu reagent. The solution was heated at 40 °C for 20 min before 800  $\mu$ L of  $\text{Na}_2\text{CO}_3$  solution (5%  $w/v$ ) was added. Ultimately, a Shimadzu spectrophotometer (UV-1700, Shimadzu Europa GmbH, Duisburg, Germany) was used to record the absorbance at 740 nm. A calibration curve was further prepared using gallic acid as a standard compound. The total polyphenol concentration ( $C_{\text{TP}}$ ) was expressed as mg gallic acid equivalents (GAE) per L. The extraction yield in total polyphenols ( $Y_{\text{TP}}$ ) was expressed as mg GAE per g of dry weight (dw), using the following Equation (S2):

$$Y_{TP} \text{ (mg GAE/g dw)} = \frac{C_{TP} \times V}{w} \quad (S2)$$

where  $V$  is the volume of the extraction medium (in L) and  $w$  is the dry weight of the sample (in g).

#### 2.4.2. Ferric reducing antioxidant power (FRAP) assay

A previously described method [2] was employed. Amount of 50  $\mu$ L ferric (III) chloride solution (4 mM in 0.05 M HCl) was well mixed with the diluted sample extract (50  $\mu$ L, 1:50) and then incubated in a water bath at 37 °C for 30 min. After that, 900  $\mu$ L of TPTZ solution (1 mM in 0.05 M HCl) was added, and the absorbance at 620 nm was measured after exactly 5 min. Ferric reducing antioxidant power ( $P_R$ ) was determined as  $\mu$ mol ascorbic acid equivalents (AAE) per g of dw, using an ascorbic acid calibration curve (50–500  $\mu$ mol/L in 0.05 M HCl) using the following Equation (S3):

$$P_R \text{ (}\mu\text{mol AAE/g dw)} = \frac{C_{AA} \times V}{w} \quad (S3)$$

where  $V$  is the volume of the extraction medium (in L) and  $w$  is the dry weight of the sample (in g).

#### 2.4.3. Radical scavenging activity ( $A_{AR}$ , DPPH assay)

A previously employed assay [3] of DPPH scavenging was followed. A volume of 25  $\mu$ L of diluted sample extract (1:5) was mixed with 975  $\mu$ L of DPPH solution (100  $\mu$ mol/L in methanol), and the absorbance at 515 nm was measured immediately after mixing ( $A_{515(i)}$ ) and exactly 30 min later ( $A_{515(f)}$ ). The capacity to scavenge the DPPH radical was expressed as:

$$\text{Inhibition (\%)} = \frac{A_{515(i)} - A_{515(f)}}{A_{515(i)}} \times 100 \quad (S4)$$

The antiradical activity ( $A_{AR}$ ) was expressed as  $\mu$ mol ascorbic acid equivalents (AAE), using an ascorbic acid calibration curve ( $C_{AA}$ , 50–1.000  $\mu$ M) and the following Equation (S5):

$$A_{AR} \text{ (}\mu\text{mol AAE/g dw)} = \frac{C_{AA} \times V}{w} \quad (S5)$$

where  $V$  is the volume of the extraction medium (in L) and  $w$  is the dry weight of the sample (in g).

#### 2.4.4. HPLC-Based Analysis of the various Polyphenolic compounds

The content of the extracts in phenolic compounds (i.e., gallic acid, neochlorogenic acid, catechin, chlorogenic acid, epicatechin, kaempferol) was determined using SPD-M20A diode array detector, after the high-performance liquid chromatography (HPLC)-based separation of the compounds with a CBM-20A liquid chromatograph (Shimadzu Europa GmbH, Duisburg, Germany) [4]. The stationary phase [Phenomenex LunaC18(2) column (100 Å, 5  $\mu$ m, 4.6  $\times$  250 mm; Phenomenex, Inc., Torrance, CA, USA) was placed in a furnace and the temperature was maintained at a constant at 40 °C. Aqueous formic acid (0.5% v/v) (A) and acetonitrile/water (6:4 v/v) containing formic acid (0.5% v/v)(B) were used as a mobile phase and the flow rate was set at 1 mL/min. The following gradient elution program was employed for the elution of the compounds: 5% B to 40% B in 40 min, then to 50% B in 10 min, and finally to 70% B in 10 min, and kept constant at 70% B for 10 min. The total run time was 70 min. The target compounds were identified by comparing the retention times and the absorbance spectra to that of the pure chemical standards. For the quantification of the compounds, the calibration curves (0–500  $\mu$ g/mL) were prepared and used.

#### 2.5. Statistical Analysis

The design of the experiment, statistical analysis related to the response surface methodology (RSM), distribution analysis, multivariate correlation analysis (MCA), partial least squares (PLS) analysis, and distribution analysis were carried out utilizing JMP® Pro 16 software from SAS, located in Cary, NC, USA. Quantitative analysis was conducted in triplicate, and the extraction processes were executed at least twice. The results are presented as medians along with their corresponding standard deviations.

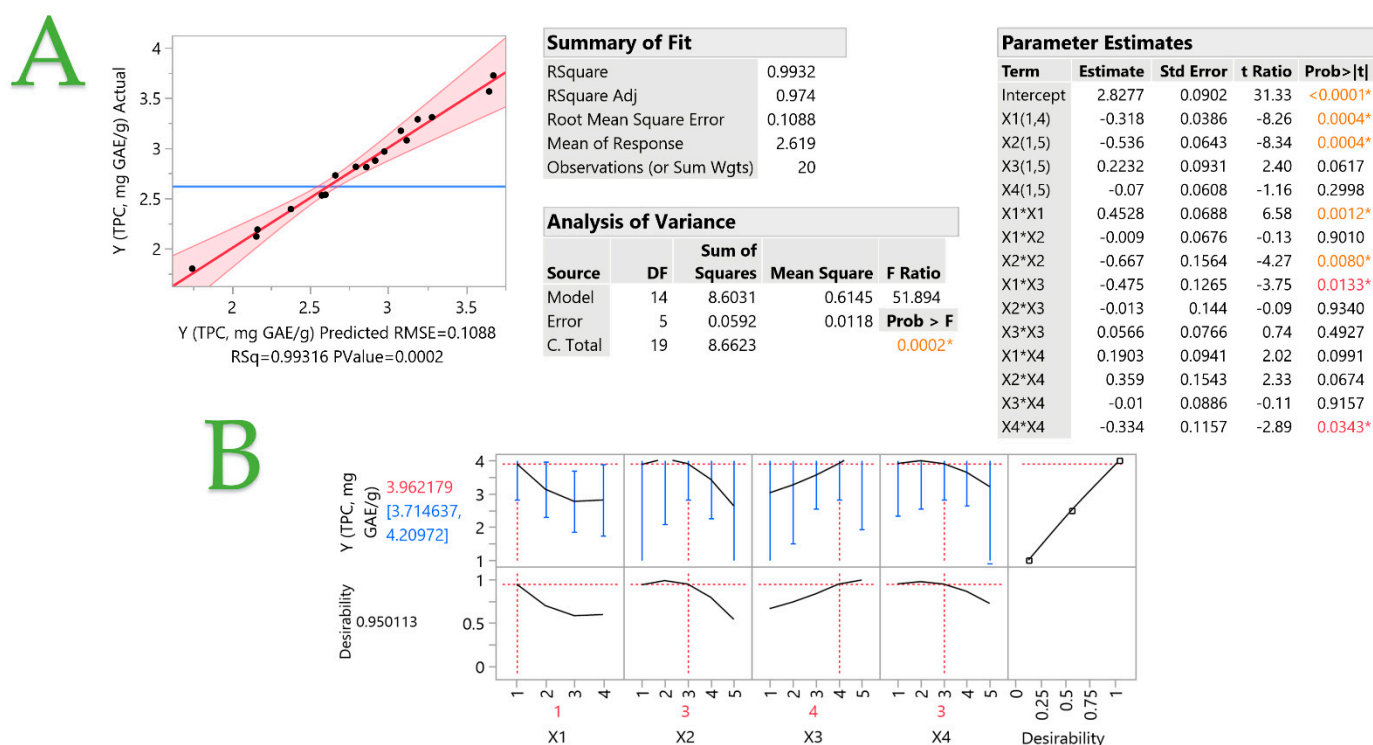

**Figure S1.** Plot **A** displays the actual response versus the predicted response (Total polyphenol content – TPC, mg gallic acid equivalents (GAE)/g) for the optimization of Galia melon peel extracts using hydroethanolic solutions, different extraction techniques, and parameters, and plot **B** displays the desirability function. Asterisks and colored values denote statistically significant values, while inset tables include statistics relevant to the evaluation of the resulting model.

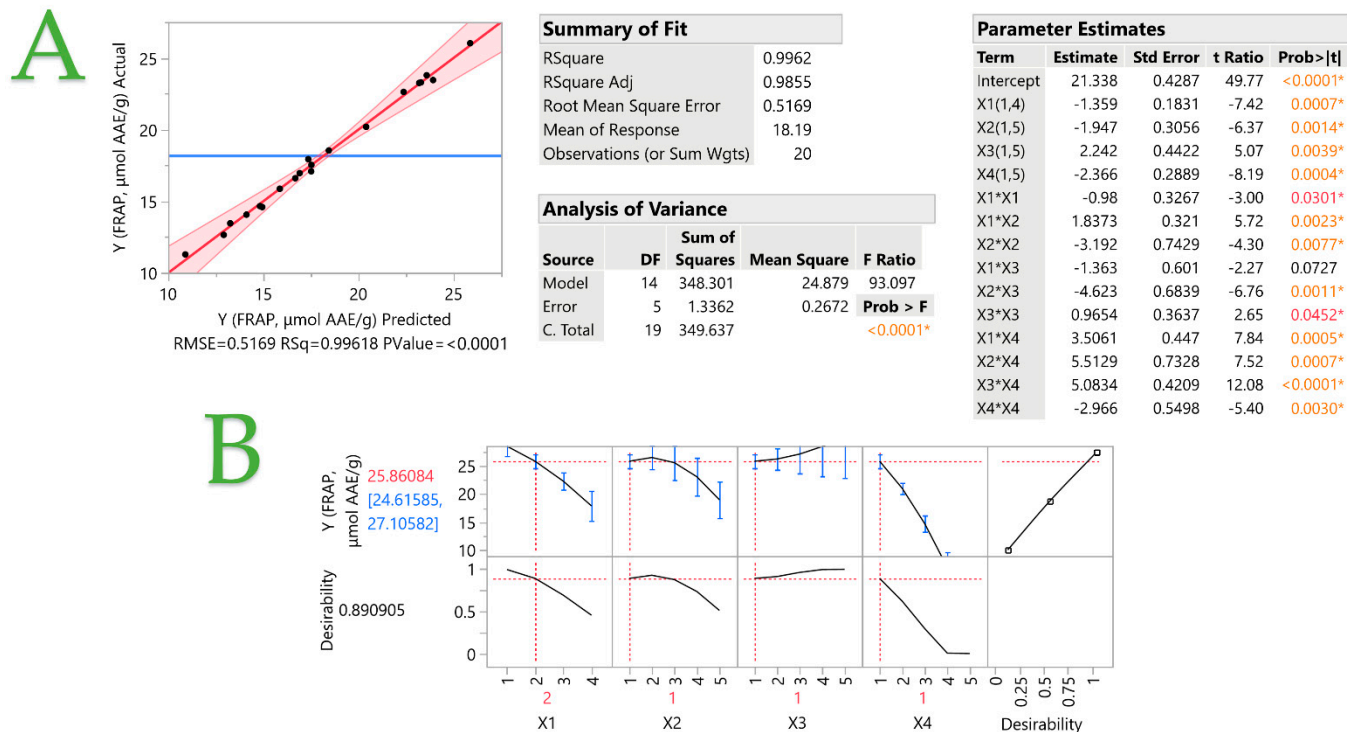

**Figure S2.** Plot **A** displays the actual response versus the predicted response (FRAP, μmol ascorbic acid equivalents (AAE)/g) for the optimization of Galia melon peel extracts using hydroethanolic solutions, different extraction techniques, and parameters, and plot **B** displays the desirability function. Asterisks and colored values denote statistically significant values, while inset tables include statistics relevant to the evaluation of the resulting model.

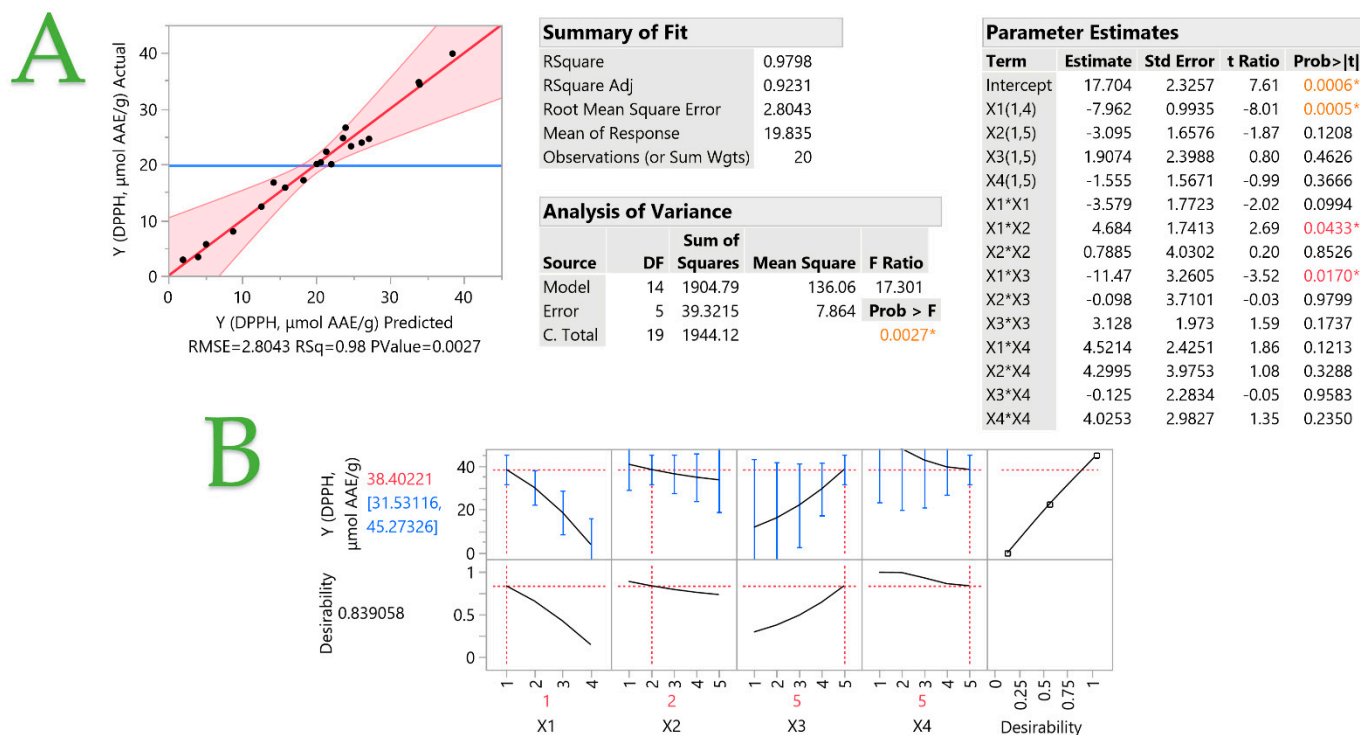

**Figure S3.** Plot **A** displays the actual response versus the predicted response (DPPH,  $\mu\text{mol ascorbic acid equivalents (AAE)/g}$ ) for the optimization of Galia melon peel extracts using hydroethanolic solutions, different extraction techniques, and parameters, and plot **B** displays the desirability function. Asterisks and colored values denote statistically significant values, while inset tables include statistics relevant to the evaluation of the resulting model.

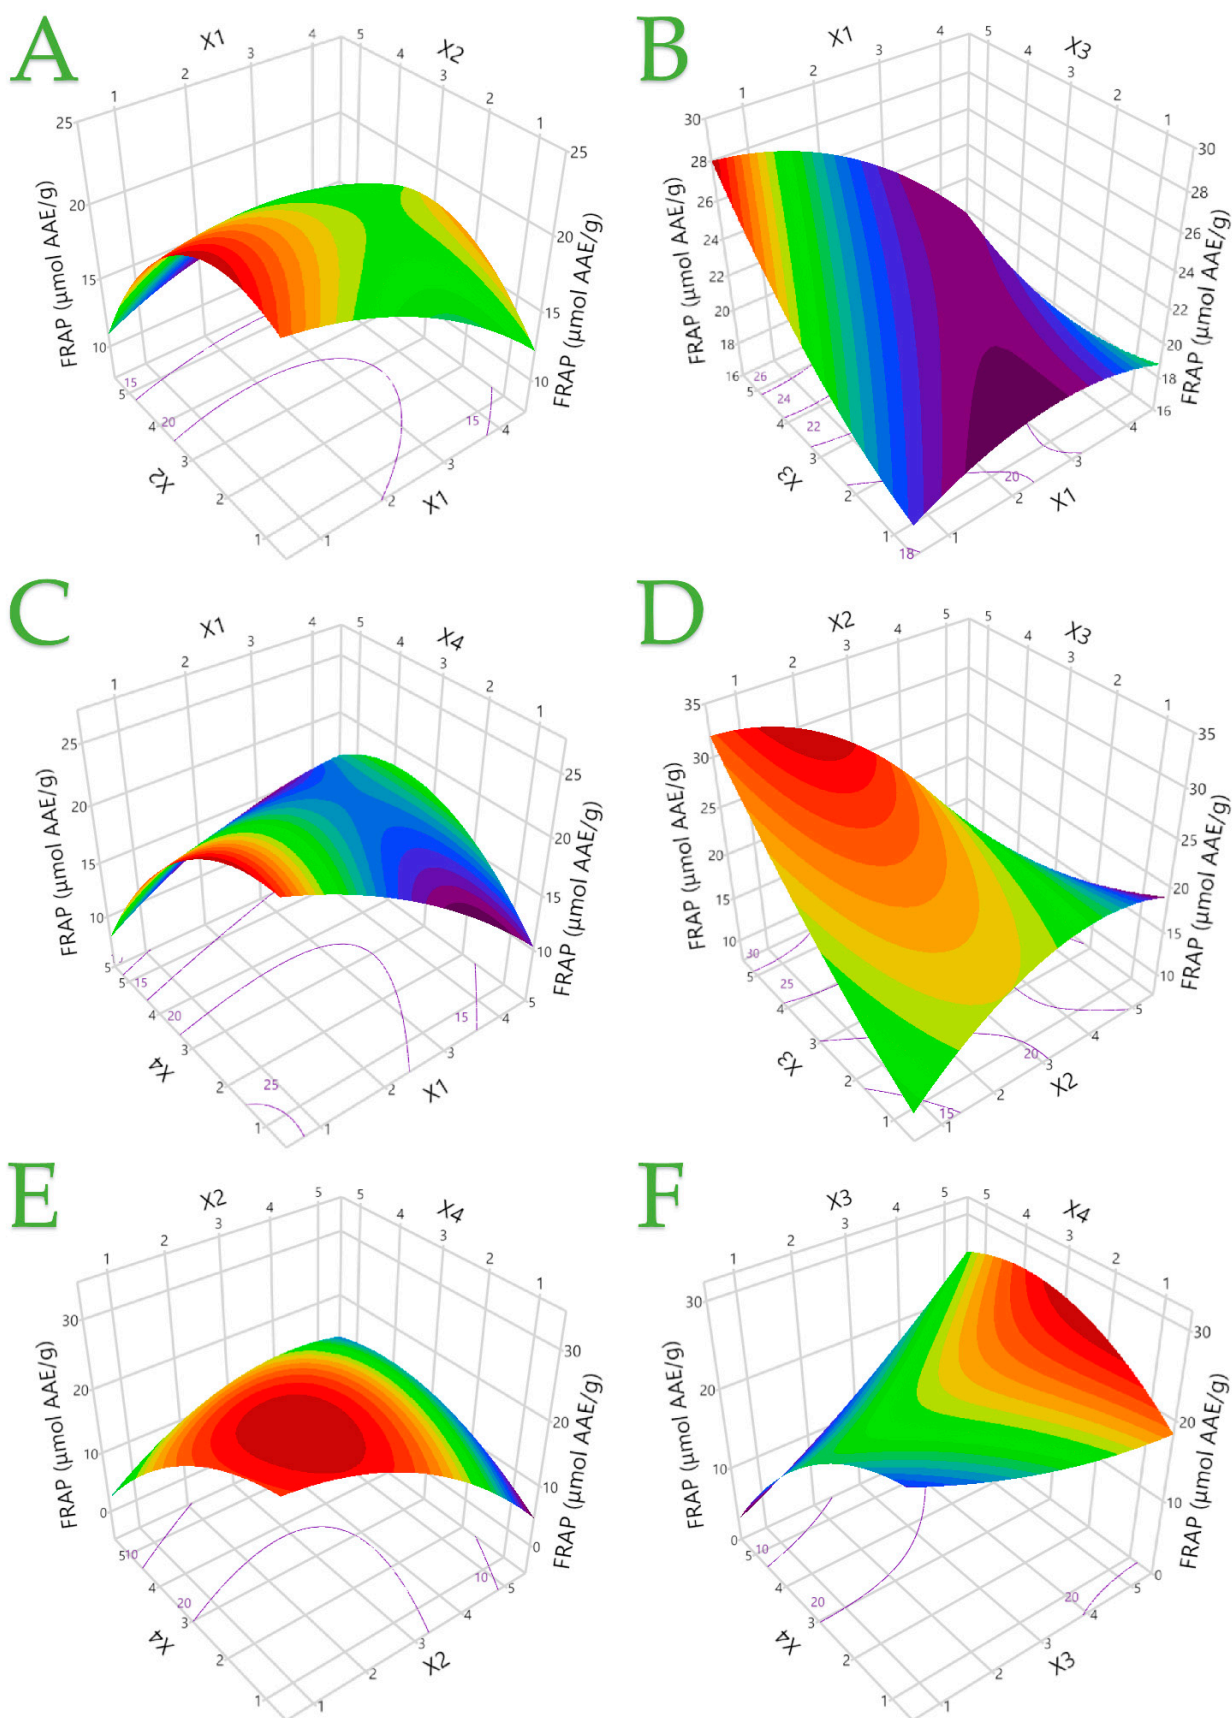

**Figure S4.** The optimal extraction of Galia melon peel extracts is shown in 3D graphs that show the impact of the process variables considered in the response (FRAP,  $\mu\text{mol ascorbic acid equivalents (AAE)/g}$ ). Plot (A), covariation of X1 and X2; plot (B), covariation of X1 and X3; plot (C), covariation of X1 and X4; plot (D), covariation of X2 and X3; plot (E), covariation of X2 and X4; plot (F), covariation of X3 and X4.



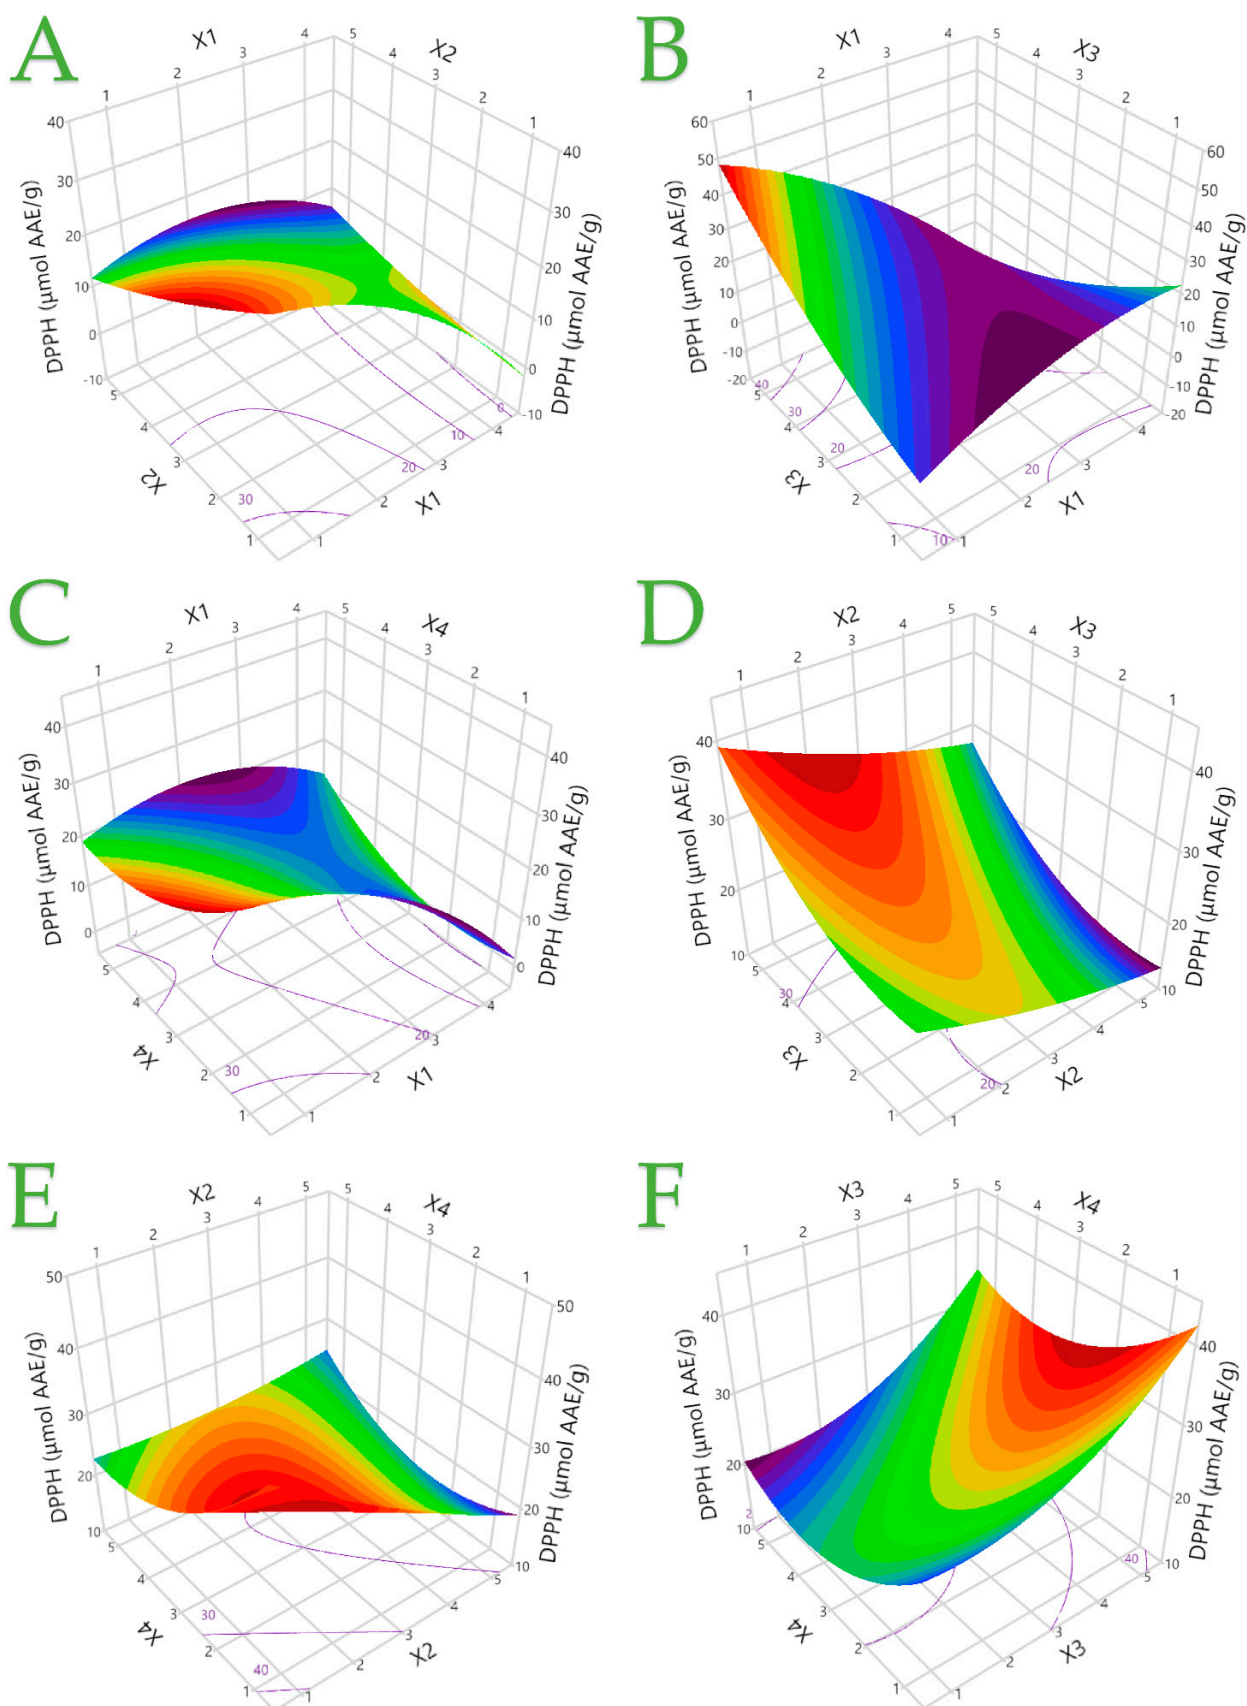

**Figure S5.** The optimal extraction of Galia melon peel extracts is shown in 3D graphs that show the impact of the process variables considered in the response (DPPH,  $\mu\text{mol ascorbic acid equivalents (AAE)/g}$ ). Plot (A), covariation of X1 and X2; plot (B), covariation of X1 and X3; plot (C), covariation of X1 and X4; plot (D), covariation of X2 and X3; plot (E), covariation of X2 and X4; plot (F), covariation of X3 and X4.

## References

1. Athanasiadis, V.; Chatzimitakos, T.; Bozinou, E.; Kotsou, K.; Palaiogiannis, D.; Lalas, S.I. Maximizing the Extraction of Bioactive Compounds from *Diospyros Kaki* Peel through the Use of a Pulsed Electric Field and Ultrasound Extraction. *Biomass* **2023**, *3*, 422–440, doi:10.3390/biomass3040025.
2. Athanasiadis, V.; Chatzimitakos, T.; Bozinou, E.; Kotsou, K.; Palaiogiannis, D.; Lalas, S.I. Optimization of Extraction Parameters for Enhanced Recovery of Bioactive Compounds from Quince Peels Using Response Surface Methodology. *Foods* **2023**, *12*, 2099, doi:10.3390/foods12112099.
3. Chatzimitakos, T.; Athanasiadis, V.; Makrygiannis, I.; Kotsou, K.; Palaiogiannis, D.; Bozinou, E.; Lalas, S.I. Nutritional Quality and Antioxidant Properties of Brown and Black Lentil Sprouts. *Horticulturae* **2023**, *9*, 668, doi:10.3390/horticulturae9060668.
4. Kotsou, K.; Stoikou, M.; Athanasiadis, V.; Chatzimitakos, T.; Mantiniotou, M.; Sfougaris, A.I.; Lalas, S.I. Enhancing Antioxidant Properties of *Prunus Spinosa* Fruit Extracts via Extraction Optimization. *Horticulturae* **2023**, *9*, doi:10.3390/horticulturae9080942.
